# Supplementary material for: Novel loci and Mapuche genetic ancestry are associated with pubertal growth traits in Chilean boys
Source: PubMed Central journal article supplement (PMC8553699; doi:10.1007/s00439-021-02290-3), 2021-05-28
Supplement: 439_2021_2290_MOESM1_ESM.pdf [file 439_2021_2290_MOESM1_ESM.pdf]

## SUPPLEMENTARY FILES

<https://www.overleaf.com/project>

### Supplementary Figures

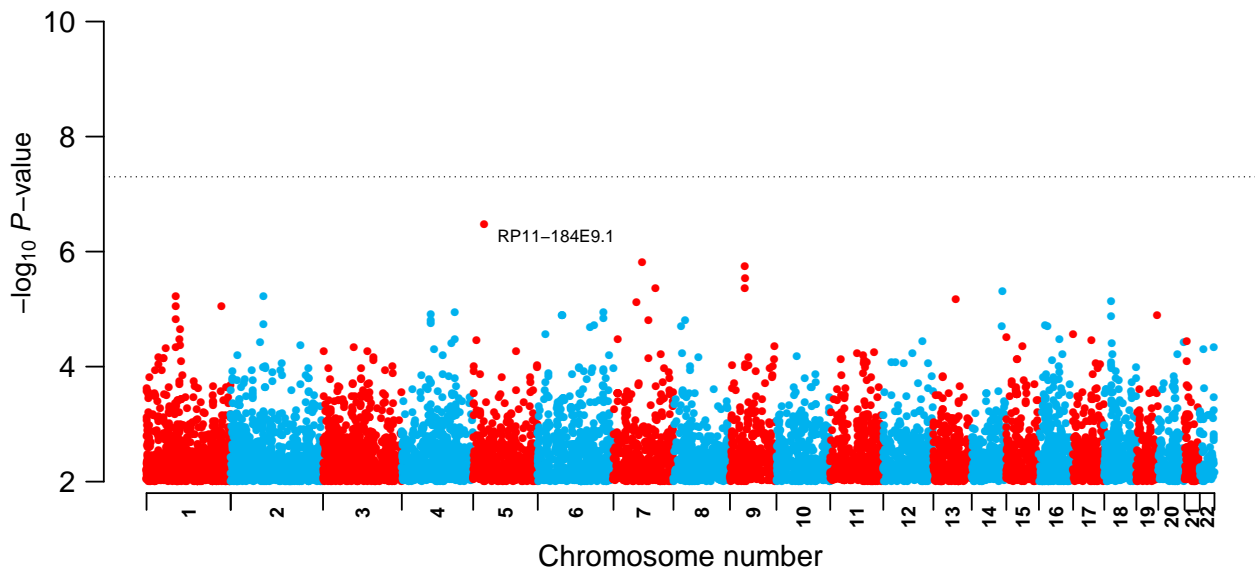

**Supplementary Figure 1. Manhattan plot for APV in boys.** Genome-wide association  $P$ -values, expressed as  $-\log_{10}(P\text{-value})$ . Highlighted are genes linked to variants with  $P\text{-value} < 10^{-6}$ . Variants with  $-\log_{10}(P\text{-value})$  between 0 and 2 are not shown.

## Supplementary Tables

| SNP ID-Allele        | Conseq     | Biotype | Gene                | $\beta_{GT}$ | $P_{GT}$ | $\beta_{GT \times Sex}$ | $P_{GT \times Sex}$ | $\beta_{GT \times LA}$ | $P_{GT \times LA}$ |
|----------------------|------------|---------|---------------------|--------------|----------|-------------------------|---------------------|------------------------|--------------------|
| <i>rs148840332-C</i> | intron/NCT | lincRNA | <i>RP11-184E9.1</i> | 1.96         | 3.4E-07  | -1.66                   | 4.8E-04             | -1.13                  | 2.7E-02            |

**Supplementary Table 1. Strongest association for APV in boys.** Shown is the SNP rs ID with the associated allele, consequence type, biotype, gene, effect size of the genotype ( $\beta_{GT}$ ), association  $P$ -value of the genotype ( $P_{GT}$ ), effect size of the interaction between genotype and sex ( $\beta_{GT \times Sex}$ ) with the corresponding association  $P$ -value ( $P_{GT \times Sex}$ ), effect size of the interaction between genotype and Native American local ancestry ( $\beta_{GT \times LA}$ ) with the corresponding association  $P$ -value ( $P_{GT \times LA}$ ). The effect of the SNP allele in males corresponds to the  $\beta_{GT}$  column, and the effect of the SNP allele in females is the sum of the effects in the  $\beta_{GT}$  and  $\beta_{GT \times Sex}$  columns. Local ancestry is coded as 0, 1 or 2 depending on the number of alleles at each SNP that originate from Native America.
